# Supplementary material
Source: HighWire-hosted journal article supplement (https://cmajopen.ca/highwire/filestream/89697/field_highwire_adjunct_files/0/open-2022-0130-1-at.pdf)
Supplement: open-2022-0130-1-at.pdf [file open-2022-0130-1-at.pdf]

## Appendix A. Completed PRESS

### PRESS Guideline 2015— Search Submission & Peer Review Assessment

Reference: McGowan J, Sampson M, Salzwedel DM, Cogo E, Foerster V, Lefebvre C. PRESS Peer Review of Electronic Search Strategies: 2015 guideline statement. *J Clin Epidemiol* 2016;75:40-6. Available: [http://www.jclinepi.com/article/S0895-4356\(16\)00058-5/pdf](http://www.jclinepi.com/article/S0895-4356(16)00058-5/pdf).

#### Search submission: This section to be filled in by the searcher

Searcher: Becky Skidmore

Email: [bskidmore@rogers.com](mailto:bskidmore@rogers.com)

Date submitted: 20 Nov 2020

Date requested by: 23 Nov 2020 early AM

#### 1. Systematic Review Title

Environmental scan of best practices for incorporating health equity in guidelines

#### 2. This search strategy is ...

|   |                                                                                                                                                                                                                   |
|---|-------------------------------------------------------------------------------------------------------------------------------------------------------------------------------------------------------------------|
| x | My PRIMARY (core) database strategy — First time submitting a strategy for search question and database                                                                                                           |
|   | My PRIMARY (core) strategy — Follow-up review NOT the first time submitting a strategy for search question and database. If this is a response to peer review, itemize the changes made to the review suggestions |
|   | SECONDARY search strategy— First time submitting a strategy for search question and database                                                                                                                      |
|   | SECONDARY search strategy — NOT the first time submitting a strategy for search question and database. If this is a response to peer review, itemize the changes made to the review suggestions                   |

#### 3. Database (e.g., MEDLINE, CINAHL)

[mandatory]

MEDLINE

#### 4. Interface (e.g., Ovid, EbscoHost...)

[mandatory]

Ovid

#### 5. Research Question (Describe the purpose of the search)

[mandatory]

The environmental scan will involve a literature search and searches for processes used by other organizations internationally.

The purpose of this objective is summarized best practices that have been described in (1) the peer reviewed literature, (2) procedures or processes from other bodies that create guidelines, and (3) the grey literature including government reports. We will summarize the findings in a narrative format and include helpful lists or figures.

**6. PICO Format** Outline the PICOs for your question — i.e., Patient, Intervention, Comparison, Outcome, and Study Design — as applicable

|                         |                     |
|-------------------------|---------------------|
| <b>P</b>                | Guideline Processes |
| <b>I /<br/>Exposure</b> | Health Equity       |
| <b>C</b>                |                     |
| <b>O</b>                |                     |
| <b>S</b>                |                     |

**7. Inclusion Criteria** (List criteria such as age groups, study designs, etc., to be included) *[optional]*

**9. Exclusion Criteria** (List criteria such as study designs, date limits, etc., to be excluded) **[optional]**

Exclude pre 2010

**10. Was a search filter applied?** No

**If YES, which one(s) (e.g., Cochrane RCT filter, PubMed Clinical Queries filter)? Provide the source if this is a published filter.** *[mandatory if YES to previous question — textbox]*

**11. Notes or comments you feel would be useful for the peer reviewer** *[optional]*

The provision of high-quality primary care is known to address inequities. We have recently recognized the importance of advancing health equity and agreed to focus efforts on health equity moving forward. This three-part proposal is to inform future work that will promote health equity.

This search is intended to be focussed for higher relevancy. The current search catches most of the records identified by the client as relevant to this topic.

**12. Please copy and paste your search strategy here, exactly as run, including the number of hits per line.**

**[mandatory]**

Database: Ovid MEDLINE(R) ALL <1946 to October 09, 2020>

Search Strategy:

- ```

1 ((guideline? or clinical practice guideline? or CPG or CPGs or evidence-based guideline?) adj5 (deprivation* or
deprive or deprived or deprives or depriving or disadvantag* or disparit* or equalit* or equit* or fair or fairness*
or inequit* or impoverish* or inequalit* or insecurit* or marginal* or poverty or underserv* or unfair* or
vulnerab*)),tw,kf. (875)
2 ((guideline? or clinical practice guideline? or CPG or CPGs or evidence-based guideline? or guidance? or
standards or consensus* or recommendat* or practice parameter* or position statement* or policy statement*)
and (deprivation* or deprive or deprived or deprives or depriving or disadvantag* or disparit* or equalit* or equit*
or fair or fairness* or inequit* or impoverish* or inequalit* or insecurit* or marginal* or poverty or underserv* or
unfair* or vulnerab*)),ti,kf. (1043)
3 exp Guidelines as Topic/ (163297)

```

- 4 ((guideline? or clinical practice guideline? or CPG or CPGs or evidence-based guideline?) adj5 (develop\* or establish\* or ethic\* or framework? or implement\* or method\* or organis\* or organiz\* or process\* or strateg\*)).tw,kf. (71538)
- 5 ((guideline? or clinical practice guideline? or CPG or CPGs or evidence-based guideline? or guidance? or standards or consensus\* or recommendat\* or practice parameter\* or position statement\* or policy statement\*) and (develop\* or establish\* or ethic\* or framework? or implement\* or method\* or organis\* or organiz\* or process\* or strateg\*)).ti,kf. (28149)
- 6 1 or 2 [GUIDELINE - EQUITY] (1739)
- 7 or/3-5 [GUIDELINES AS TOPIC/PROCESSES, ETC.] (232922)
- 8 6 and 7 [GUIDELINE - EQUITY - PROCESSES, ETC.] (691)
- 9 exp Animals/ not Humans/ (4742879)
- 10 8 not 9 [ANIMAL-ONLY REMOVED] (686)
- 11 (comment or editorial or news or newspaper article).pt. (1477478)
- 12 (letter not (letter not randomized controlled trial)).pt. (5309)
- 13 10 not (11 not 12) [OPINION PIECES REMOVED] (664)
- 14 limit 13 to yr="2010-current" (497)

**Peer review assessment: this section to be filled in by the reviewer**

|                            |                                                                         |                             |
|----------------------------|-------------------------------------------------------------------------|-----------------------------|
| Reviewer: Kaitryn Campbell | Email: <a href="mailto:kcamlolo668@gmail.com">kcamlolo668@gmail.com</a> | Date completed: 21 Nov 2020 |
|----------------------------|-------------------------------------------------------------------------|-----------------------------|

Do you wish to be acknowledged? (If yes, the review team will be advised to add an acknowledgement to any publications related to this work). No – unless your organization requires it  
 The suggested acknowledgement is “We thank Xxxxx Yyyyyy, MLIS, AHIP (xxxxx Health Sciences Library, University of xxxxxx) for peer review of the MEDLINE search strategy.” [please edit to indicate your name, postnominals and institutional affiliation as you would like them presented].

**1. TRANSLATION**

|                             |   |
|-----------------------------|---|
| A ---No revisions           | X |
| B --- Revision(s) suggested |   |
| C --- Revision(s) required  |   |

If “B” or “C,” please provide an explanation or example:

**2. BOOLEAN AND PROXIMITY OPERATORS**

|                             |   |
|-----------------------------|---|
| A ---No revisions           | X |
| B --- Revision(s) suggested |   |
| C --- Revision(s) required  |   |

If “B” or “C,” please provide an explanation or example:

**3. SUBJECT HEADINGS**

|                             |   |
|-----------------------------|---|
| A ---No revisions           | X |
| B --- Revision(s) suggested |   |
| C --- Revision(s) required  |   |

If “B” or “C,” please provide an explanation or example:

#### 4. TEXT WORD SEARCHING

|                           |   |
|---------------------------|---|
| A --No revisions          | X |
| B -- Revision(s)suggested |   |
| C -- Revision(s) required |   |

If “B” or “C,” please provide an explanation or example:

#### 5. SPELLING, SYNTAX, AND LINE NUMBERS

|                           |   |
|---------------------------|---|
| A --No revisions          | X |
| B -- Revision(s)suggested |   |
| C -- Revision(s) required |   |

If “B” or “C,” please provide an explanation or example:

#### 6. LIMITS AND FILTERS

|                            |   |
|----------------------------|---|
| A --No revisions           | X |
| B -- Revision(s) suggested |   |
| C -- Revision(s) required  |   |

If “B” or “C,” please provide an explanation or example:

OVERALL EVALUATION (Note: If one or more “revision required” is noted above, the response below must be “revisions required”.)

|                            |   |
|----------------------------|---|
| A --No revisions           | X |
| B -- Revision(s) suggested |   |
| C -- Revision(s) required  |   |

Additional comments:

No errors or omissions, and no suggestions. Looks solid.
